# Supplementary material for: New Experimental Equipment Recreating Geo-Reservoir Conditions in Large, Fractured, Porous Samples to Investigate Coupled Thermal, Hydraulic and Polyaxial Stress Processes
Source: Springer Nature journal article supplement (doi:10.1038/s41598-018-32753-z), 2018-09-24
Supplement: MOESM1 [file 41598_2018_32753_MOESM1_ESM.pdf]

## **SUPPLEMENTARY INFORMATION For**

### **New Experimental Equipment Recreating Geo-Reservoir Conditions in Large, Fractured, Porous Samples to Investigate Coupled Thermal, Hydraulic and Polyaxial Stress Processes.**

**\*C. I. McDermott<sup>1</sup>, A. Fraser-Harris<sup>1</sup>, M. Sauter<sup>3</sup>, G. D. Couples<sup>2</sup>, K. Edlmann<sup>1</sup>, O. Kolditz<sup>4,5</sup>, A. Lightbody<sup>1</sup>, J. Somerville<sup>2</sup>, W. Wang<sup>4</sup>**

<sup>1</sup> University of Edinburgh, School of Geosciences, The King's Buildings, James Hutton Road, Edinburgh EH9 3FE.

<sup>2</sup> Heriot-Watt University, Institute of Petroleum Engineering, Edinburgh EH14 4AS

<sup>3</sup> University of Göttingen, Centre of Geosciences, Goldschmidtstr. 3, 37077 Göttingen

<sup>4</sup> Helmholtz Centre for Environmental Research – UFZ, Department of Environmental Informatics, Permoserstraße 15 / 04318 Leipzig / Germany.

<sup>5</sup> Applied Chair Environmental System Analysis, Technische Universität Dresden, Germany.

Corresponding author: Christopher McDermott ([christopher.mcdermott@ed.ac.uk](mailto:christopher.mcdermott@ed.ac.uk))

## Supplementary Information

*Symmetrical and triaxial stress fields for Test M1 on homogeneous sample,  $\sigma_1$  is the vertical axial load,  $\sigma_2$  and  $\sigma_3$  are in the horizontal plane.*

|                               | PEE 1 | PEE 2 | PEE 3 | PEE 4 | PEE 8A | PEE 7A | PEE 6A | PEE 5A |
|-------------------------------|-------|-------|-------|-------|--------|--------|--------|--------|
| Angle PEE 1 to $\sigma_2$ (°) | (MPa) | (MPa) | (MPa) | (MPa) | (MPa)  | (MPa)  | (MPa)  | (MPa)  |
| $\sigma_2=\sigma_3$           | 7.71  | 7.70  | 8.30  | 7.80  | 7.74   | 7.70   | 8.30   | 7.72   |
| -11.25                        | 7.73  | 5.70  | 4.39  | 2.40  | 2.30   | 4.00   | 6.40   | 7.70   |
| 11.25                         | 7.70  | 7.73  | 5.70  | 3.70  | 2.00   | 2.30   | 4.28   | 5.70   |
| 33.75                         | 6.20  | 7.73  | 7.70  | 5.72  | 3.70   | 2.10   | 2.29   | 3.90   |
| 56.25                         | 4.26  | 6.18  | 7.70  | 7.70  | 5.72   | 3.70   | 2.29   | 2.30   |
| 78.75                         | 2.27  | 4.30  | 6.30  | 7.70  | 7.72   | 5.71   | 3.70   | 2.30   |
| -78.75                        | 2.30  | 2.29  | 4.30  | 6.17  | 7.72   | 7.73   | 5.71   | 3.70   |
| -56.25                        | 3.70  | 2.30  | 2.38  | 4.20  | 6.10   | 7.73   | 7.72   | 5.70   |
| -33.75                        | 6.38  | 4.18  | 2.46  | 2.32  | 4.01   | 5.28   | 7.64   | 7.66   |
| -11.25                        | 7.76  | 5.70  | 3.70  | 2.30  | 2.30   | 4.20   | 6.27   | 7.71   |

*Symmetrical and triaxial stress fields for Test 2 HM1 on a fractured sample, fluid flow through fracture without in situ fracture fluid pressure. PEE 7A is in the plane of the fracture,  $\sigma_1$  is the vertical axial load,  $\sigma_2$  and  $\sigma_3$  are in the horizontal plane.*

|                               | PEE 1 | PEE 2 | PEE 3 | PEE 4 | PEE 8A | PEE 7A | PEE 6A | PEE 5A |
|-------------------------------|-------|-------|-------|-------|--------|--------|--------|--------|
| Angle PEE 1 to $\sigma_2$ (°) | (MPa) | (MPa) | (MPa) | (MPa) | (MPa)  | (MPa)  | (MPa)  | (MPa)  |
| $\sigma_2=\sigma_3$           | 8.80  | 8.80  | 9.20  | 9.00  | 8.90   | 8.70   | 9.30   | 8.70   |
| -56.25                        | 7.10  | 6.30  | 6.30  | 6.90  | 7.90   | 8.70   | 8.80   | 7.80   |
| 33.75                         | 7.70  | 8.70  | 8.70  | 7.70  | 7.30   | 6.30   | 6.30   | 6.60   |
| 56.25                         | 7.20  | 8.20  | 8.70  | 8.70  | 7.80   | 6.80   | 6.30   | 6.20   |
| 78.75                         | 6.20  | 7.20  | 8.30  | 8.70  | 8.70   | 7.70   | 6.90   | 6.30   |
| -11.25                        | 6.20  | 6.20  | 7.30  | 8.10  | 8.70   | 8.70   | 7.80   | 6.70   |
| 67.5                          | 6.80  | 6.40  | 6.90  | 7.50  | 8.20   | 8.70   | 8.30   | 7.20   |

*Fluid pressure measurements for different normal stresses across a fracture generated by rotating a triaxial stress field in Test 2 HM1*

| Normal Stress | Inlet fluid pressure | Outlet fluid pressure | Normal Eff. Stress | dP/dx  | Flow Rate | Perm. $k$ | Ap. $e$ |
|---------------|----------------------|-----------------------|--------------------|--------|-----------|-----------|---------|
| MPa           | MPa                  | MPa                   | MPa                | MPa/m  | ml/min    | $m^2$     | $\mu m$ |
| 8.81          | 1.0094               | 0                     | 8.81               | 1.3123 | 30        | 1.10E-10  | 36.38   |
| 6.39          | 1.0102               | 0                     | 6.39               | 1.3132 | 30        | 1.31E-10  | 39.61   |
| 8.61          | 1.0107               | 0                     | 8.61               | 1.3140 | 30        | 1.15E-10  | 37.08   |
| 7.94          | 1.0115               | 0                     | 7.94               | 1.3149 | 30        | 1.16E-10  | 37.39   |
| 7.01          | 1.0120               | 0                     | 7.01               | 1.3157 | 30        | 1.23E-10  | 38.41   |
| 6.30          | 1.0125               | 0                     | 6.30               | 1.3162 | 30        | 1.28E-10  | 39.26   |
| 6.40          | 1.0128               | 0                     | 6.40               | 1.3166 | 30        | 1.28E-10  | 39.15   |

Symmetrical and triaxial stress measurements for Test 3 HM2 on a fractured sample, fluid flow through fracture with in situ fracture fluid pressure of 3.43 MPa, PEE7A is in the plane of the fracture,  $\sigma_1$  is the vertical axial load,  $\sigma_2$  and  $\sigma_3$  are in the horizontal plane.

|                               | PEE 1 | PEE 2 | PEE 3 | PEE 4 | PEE 8A | PEE 7A | PEE 6A | PEE 5A |
|-------------------------------|-------|-------|-------|-------|--------|--------|--------|--------|
| Angle PEE 1 to $\sigma_2$ (°) | (MPa) | (MPa) | (MPa) | (MPa) | (MPa)  | (MPa)  | (MPa)  | (MPa)  |
| $\sigma_2=\sigma_3$           | 8.72  | 8.73  | 9.13  | 8.73  | 8.72   | 8.72   | 9.24   | 8.71   |
| -56.25                        | 7.20  | 6.27  | 6.29  | 7.10  | 7.90   | 8.72   | 8.70   | 7.90   |
| 33.75                         | 7.70  | 8.74  | 8.71  | 7.70  | 7.20   | 6.28   | 6.29   | 6.71   |
| 56.25                         | 7.20  | 8.10  | 8.80  | 8.76  | 7.80   | 6.70   | 6.28   | 6.30   |
| 78.75                         | 6.23  | 7.29  | 8.21  | 8.74  | 8.68   | 7.68   | 6.94   | 6.12   |
| -11.25                        | 6.20  | 6.30  | 7.24  | 8.20  | 8.78   | 8.72   | 7.80   | 6.80   |
| -56.25                        | 6.80  | 6.20  | 6.30  | 7.20  | 8.20   | 8.80   | 8.70   | 7.70   |

Fluid pressure measurements for different normal stresses across a fracture generated by rotating a triaxial stress field in Test 3 HM2, with an in situ fracture pressure of 3.43 MPa

| Normal Stress | Inlet fluid pressure | Outlet fluid pressure | Normal Eff. Stress | dP/dx | Flow Rate | Perm. k        | Ap. e |
|---------------|----------------------|-----------------------|--------------------|-------|-----------|----------------|-------|
| MPa           | MPa                  | MPa                   | MPa                | MPa/m | ml/min    | m <sup>2</sup> | μm    |
| 8.84          | 3.62                 | 3.43                  | 5.41               | 3.90  | 23.50     | 4.53E-11       | 23.32 |
| 6.38          | 3.58                 | 3.43                  | 2.95               | 3.06  | 24.05     | 5.42E-11       | 25.49 |
| 8.63          | 3.61                 | 3.43                  | 5.20               | 3.62  | 24.95     | 4.96E-11       | 24.39 |
| 8.01          | 3.61                 | 3.43                  | 4.58               | 3.59  | 20.06     | 4.31E-11       | 22.73 |
| 6.96          | 3.60                 | 3.43                  | 3.53               | 3.35  | 24.93     | 5.21E-11       | 25.01 |
| 6.35          | 3.58                 | 3.43                  | 2.92               | 3.01  | 21.57     | 5.09E-11       | 24.71 |
| 6.35          | 3.58                 | 3.43                  | 2.92               | 3.04  | 24.98     | 5.58E-11       | 25.87 |
